# Supplementary material for: Interaction dynamics between innate and adaptive immune cells responding to SARS-CoV-2 vaccination in non-human primates
Source: PubMed Central journal article supplement (PMC10693617; doi:10.1038/s41467-023-43420-x), 2023-12-02
Supplement: 41467_2023_43420_MOESM1_ESM.pdf [file 41467_2023_43420_MOESM1_ESM.pdf]

A

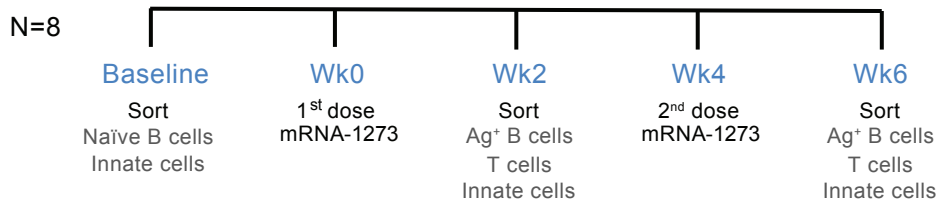

B

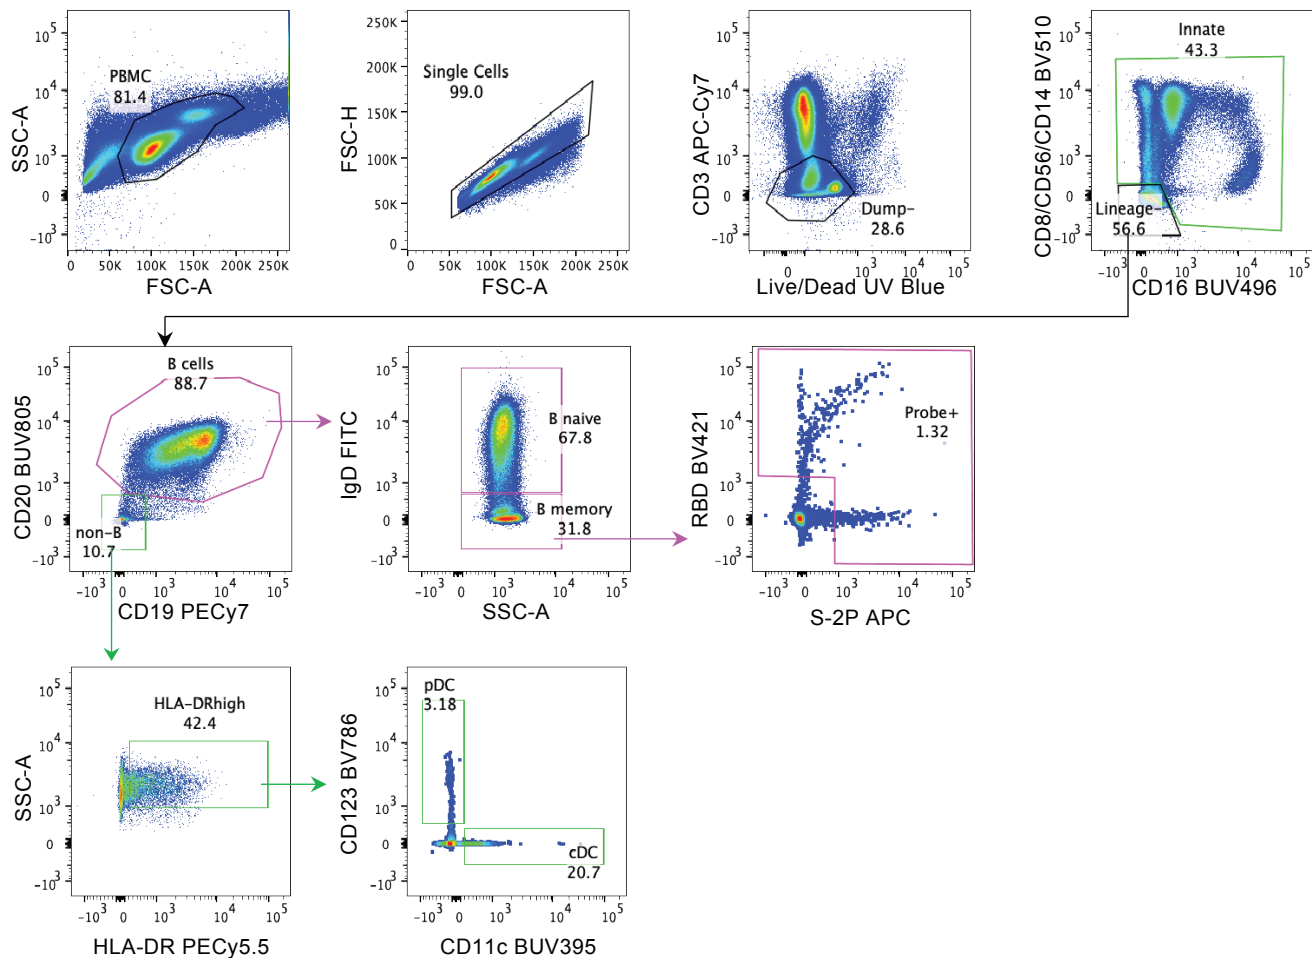

C

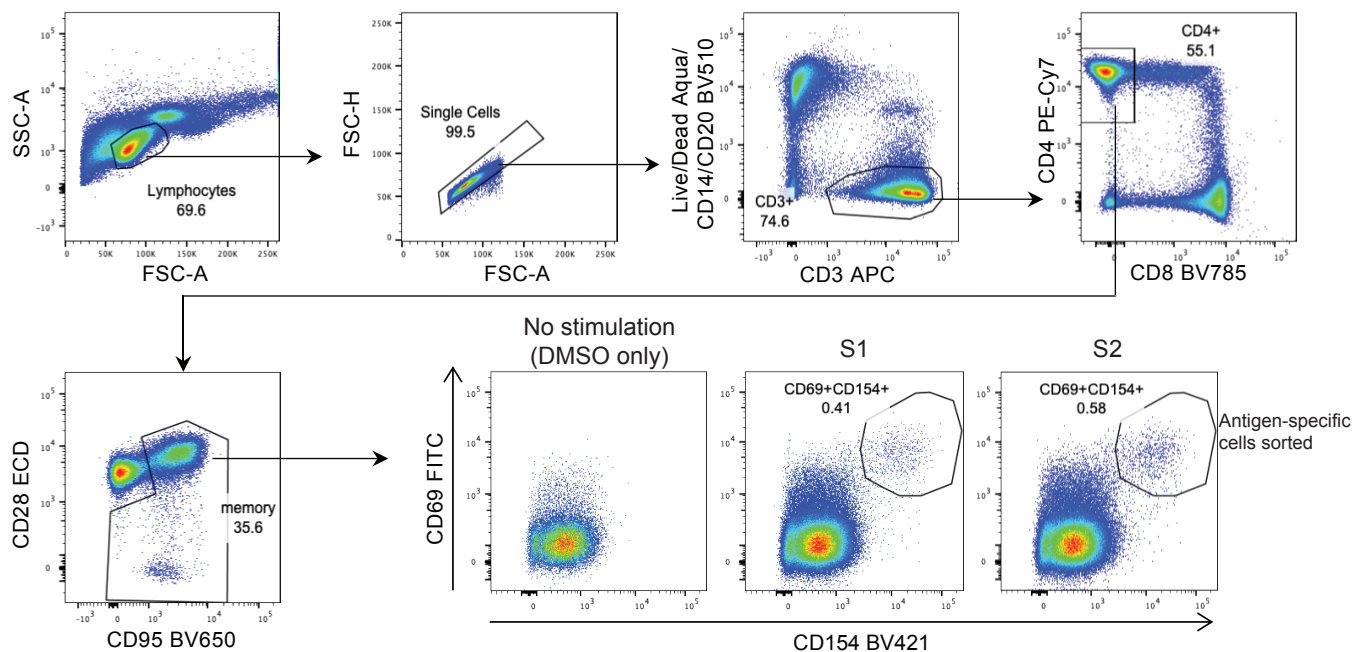

**Fig. S1. Study design and sort strategies.** (A) Vaccination schedule and timeline of sample collection for sort of each cell type. (B) Sorting strategy for B cells (pink gates) explored on Fig 1 and innate cells (green gates) explored on Fig 6. (C) Sorting strategy for non-specific T cells (memory CD4 T cells from DMSO control) and antigen-specific T cells explored on Fig 4.

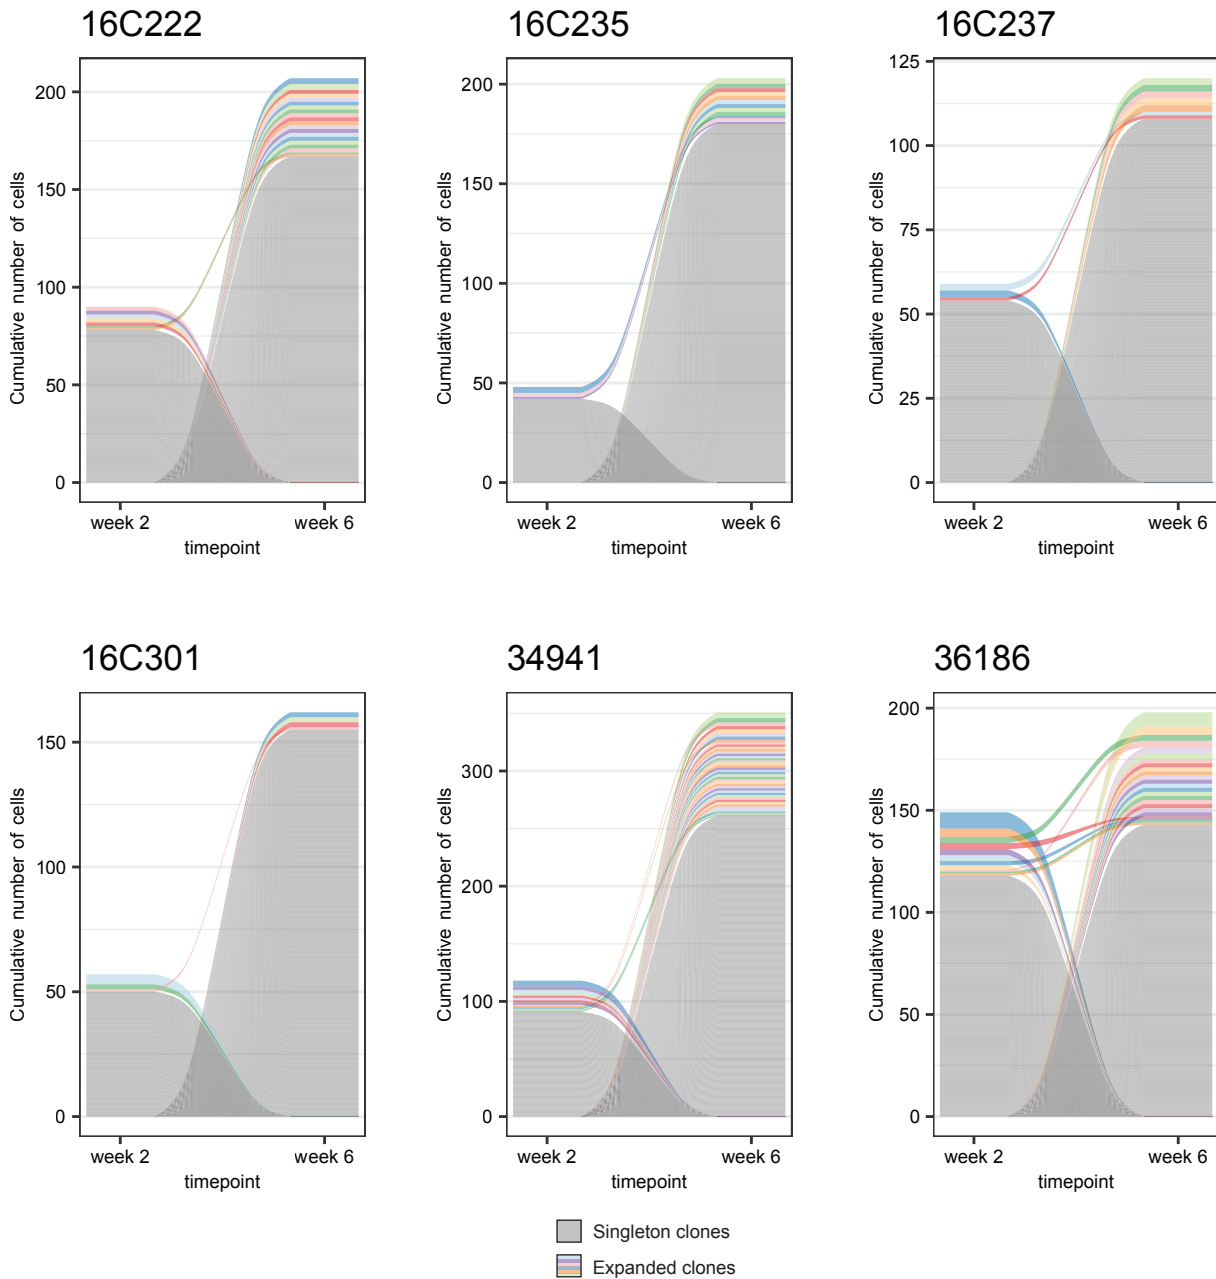

**Fig. S2. B cell clonal dynamics of 6 animals.** Alluvial plots, with grey lines representing singleton B cells and colored lines represent expanded lineages. Lines that start or end at zero, including all singleton, indicate B cell lineages that were observed in only a single time point. Colored lines that span the graph represent lineages found at both time points. The thickness of each line at either side of the panel is proportional to the number of cells in that lineage at the corresponding time point, with the cumulative number of cells in all lineages indicated on the y-axis. A total of 521 cells from week 2 and 1,241 cells from week 6 were analyzed. No plot is shown for animal 16C303, for which no week 6 IG sequences are available.

**A**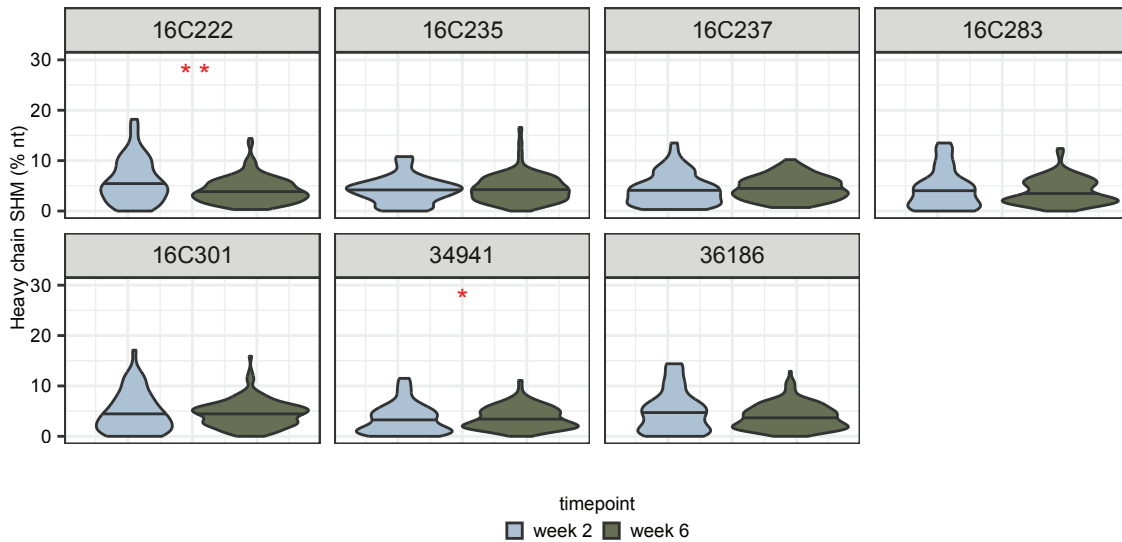**B**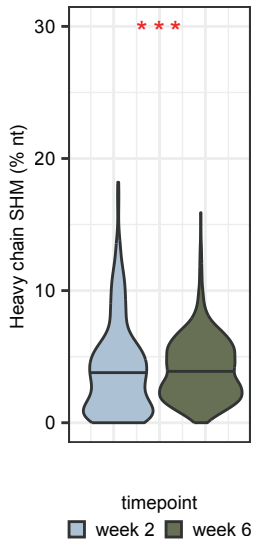**C**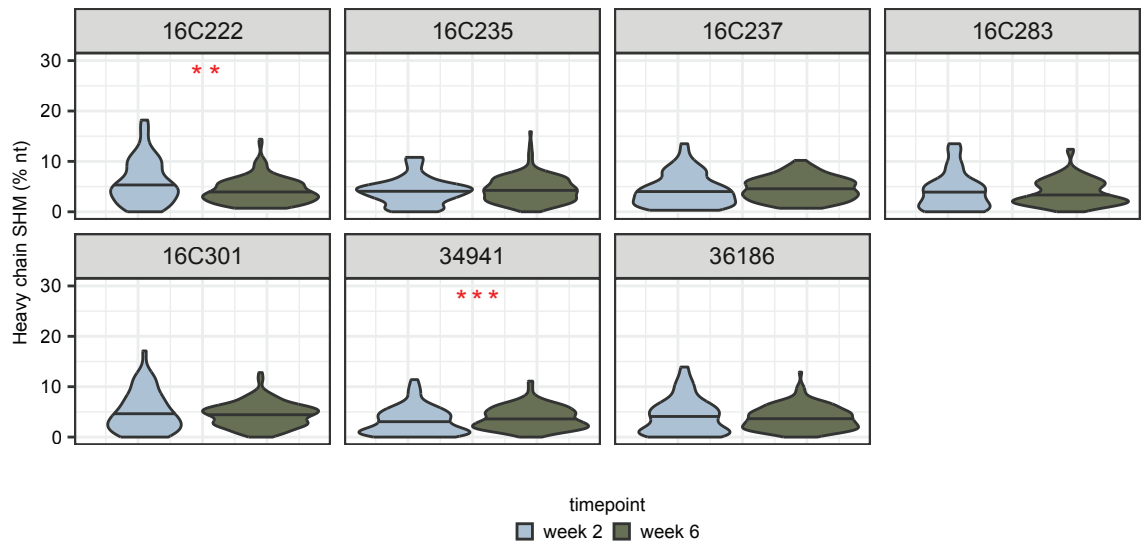

**Fig. S3. Additional analysis of heavy chain somatic hypermutation (SHM).** (A) Same data as shown in Fig. 2B, divided by animal. N=604 cells at week 2 and 1,393 cells at week 6. 92 cells from animal 16C303 at week 2 are not included, as no matching week 6 data were available from that animal. Distributions were compared using a 2-sided unpaired Wilcoxon test.  $P = 0.0025$  for 16C222 and  $0.019$  for 34941. (B) Heavy chain SHM down-sampled to one cell per lineage to account for possible confounding effects due to correlations in SHM among cells in the same lineage. N=641 lineages at week 2 and 1,238 lineages at week 6. Distributions were compared using a 2-sided unpaired Wilcoxon test,  $P = 3.8E-4$ . (C) The same data as in (B), divided by animal, except that 87 lineages from animal 16C303 at week 2 are not included. N=554 lineages at week 2 and 1,238 lineages at week 6. Distributions were compared using a 2-sided unpaired Wilcoxon test.  $P = 1.1E-5$  for 16C235 and  $7.5E-4$  for 34941.

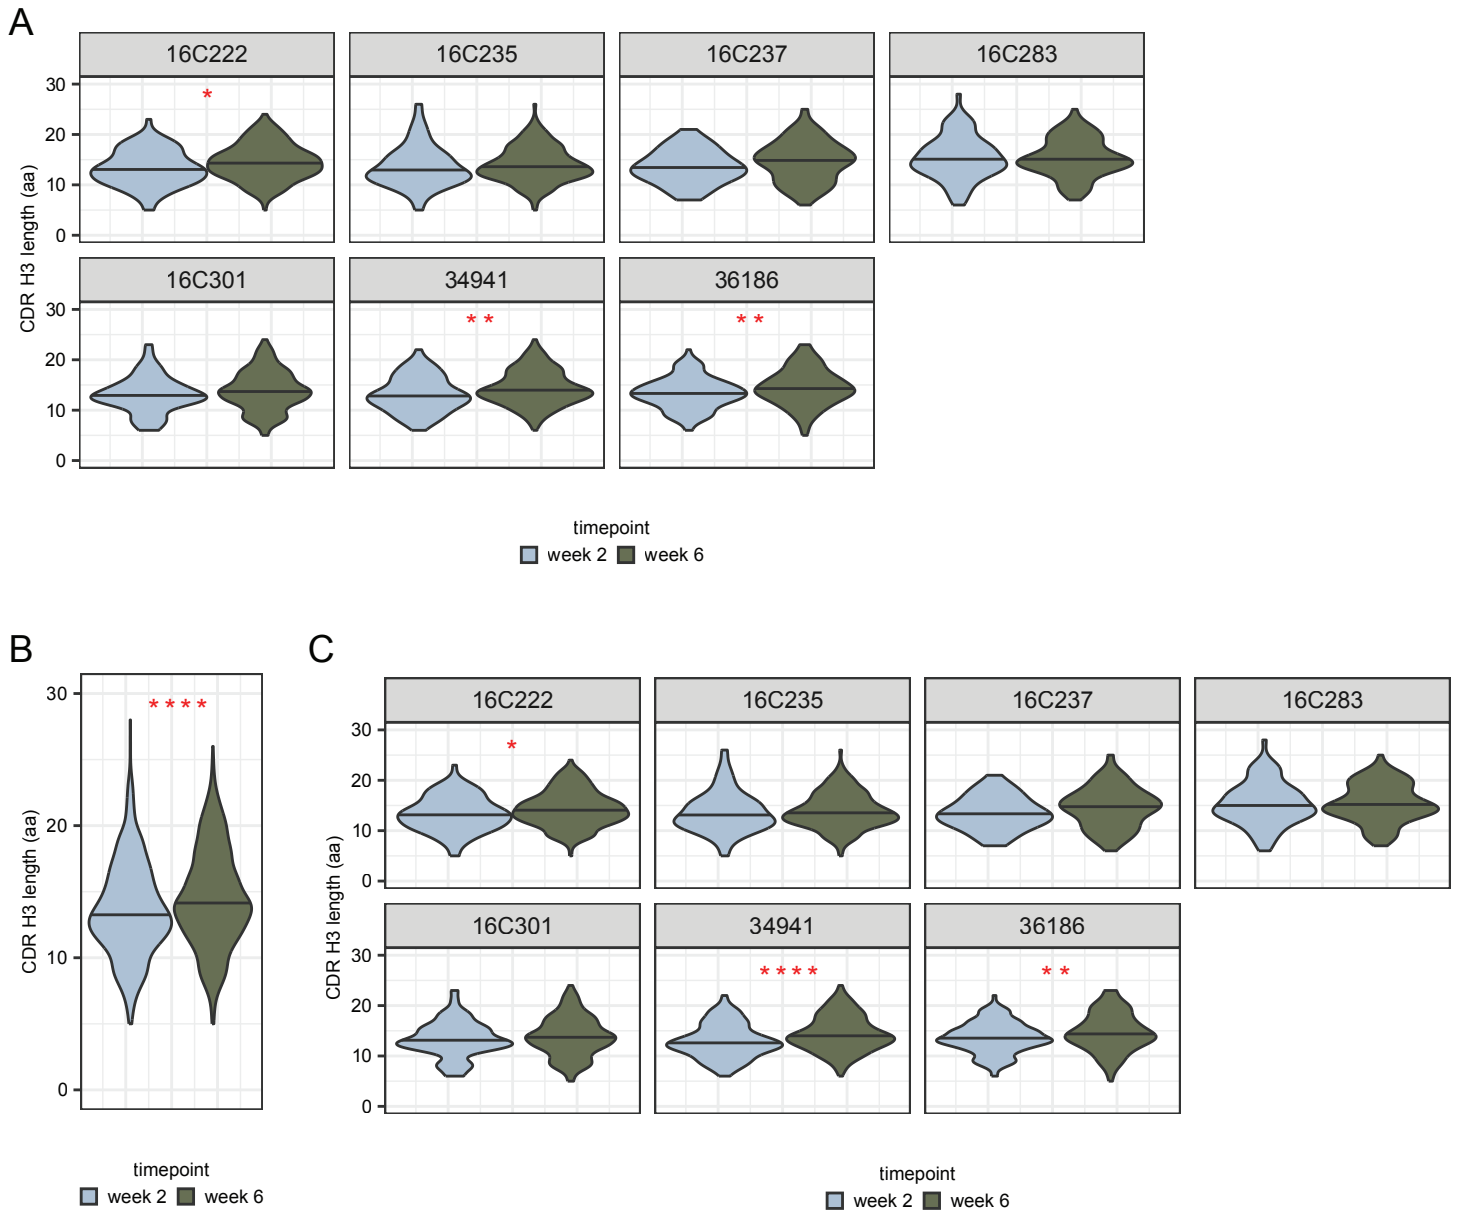

**Fig. S4. Additional analysis of CDR H3 length. (A)** Same data as shown in Fig. 2C, divided by animal. N=554 lineages at week 2 and 1,238 lineages at week 6. 87 lineages from animal 16C303 at week 2 are not included, as no matching week 6 data were available from that animal. Distributions were compared using a 2-sided unpaired Wilcoxon test.  $P = 0.01$ ,  $0.012$ , and  $0.0048$  for 16C222, 34941, and 36186, respectively. **(B)** CDR H3 length distributions calculated using all cells in the data set. Although CDR H3 length is effectively constant within a lineage and thus not statistically independent, this shows the full post-antigen selection repertoire, including any clonal expansion. N=696 cells at week 2 and 1,393 cells at week 6. Distributions were compared using a 2-sided unpaired Wilcoxon test,  $P = 1.2E-7$ . **(C)** The same data as in (B), divided by animal, except that 92 cells from animal 16C303 at week 2 are not included. N=604 cells at week 2 and 1,393 cells at week 6. Distributions were compared using a 2-sided unpaired Wilcoxon test.  $P = 0.029$ ,  $5.6E-5$ , and  $0.0059$  for 16C222, 34941, and 36186, respectively.

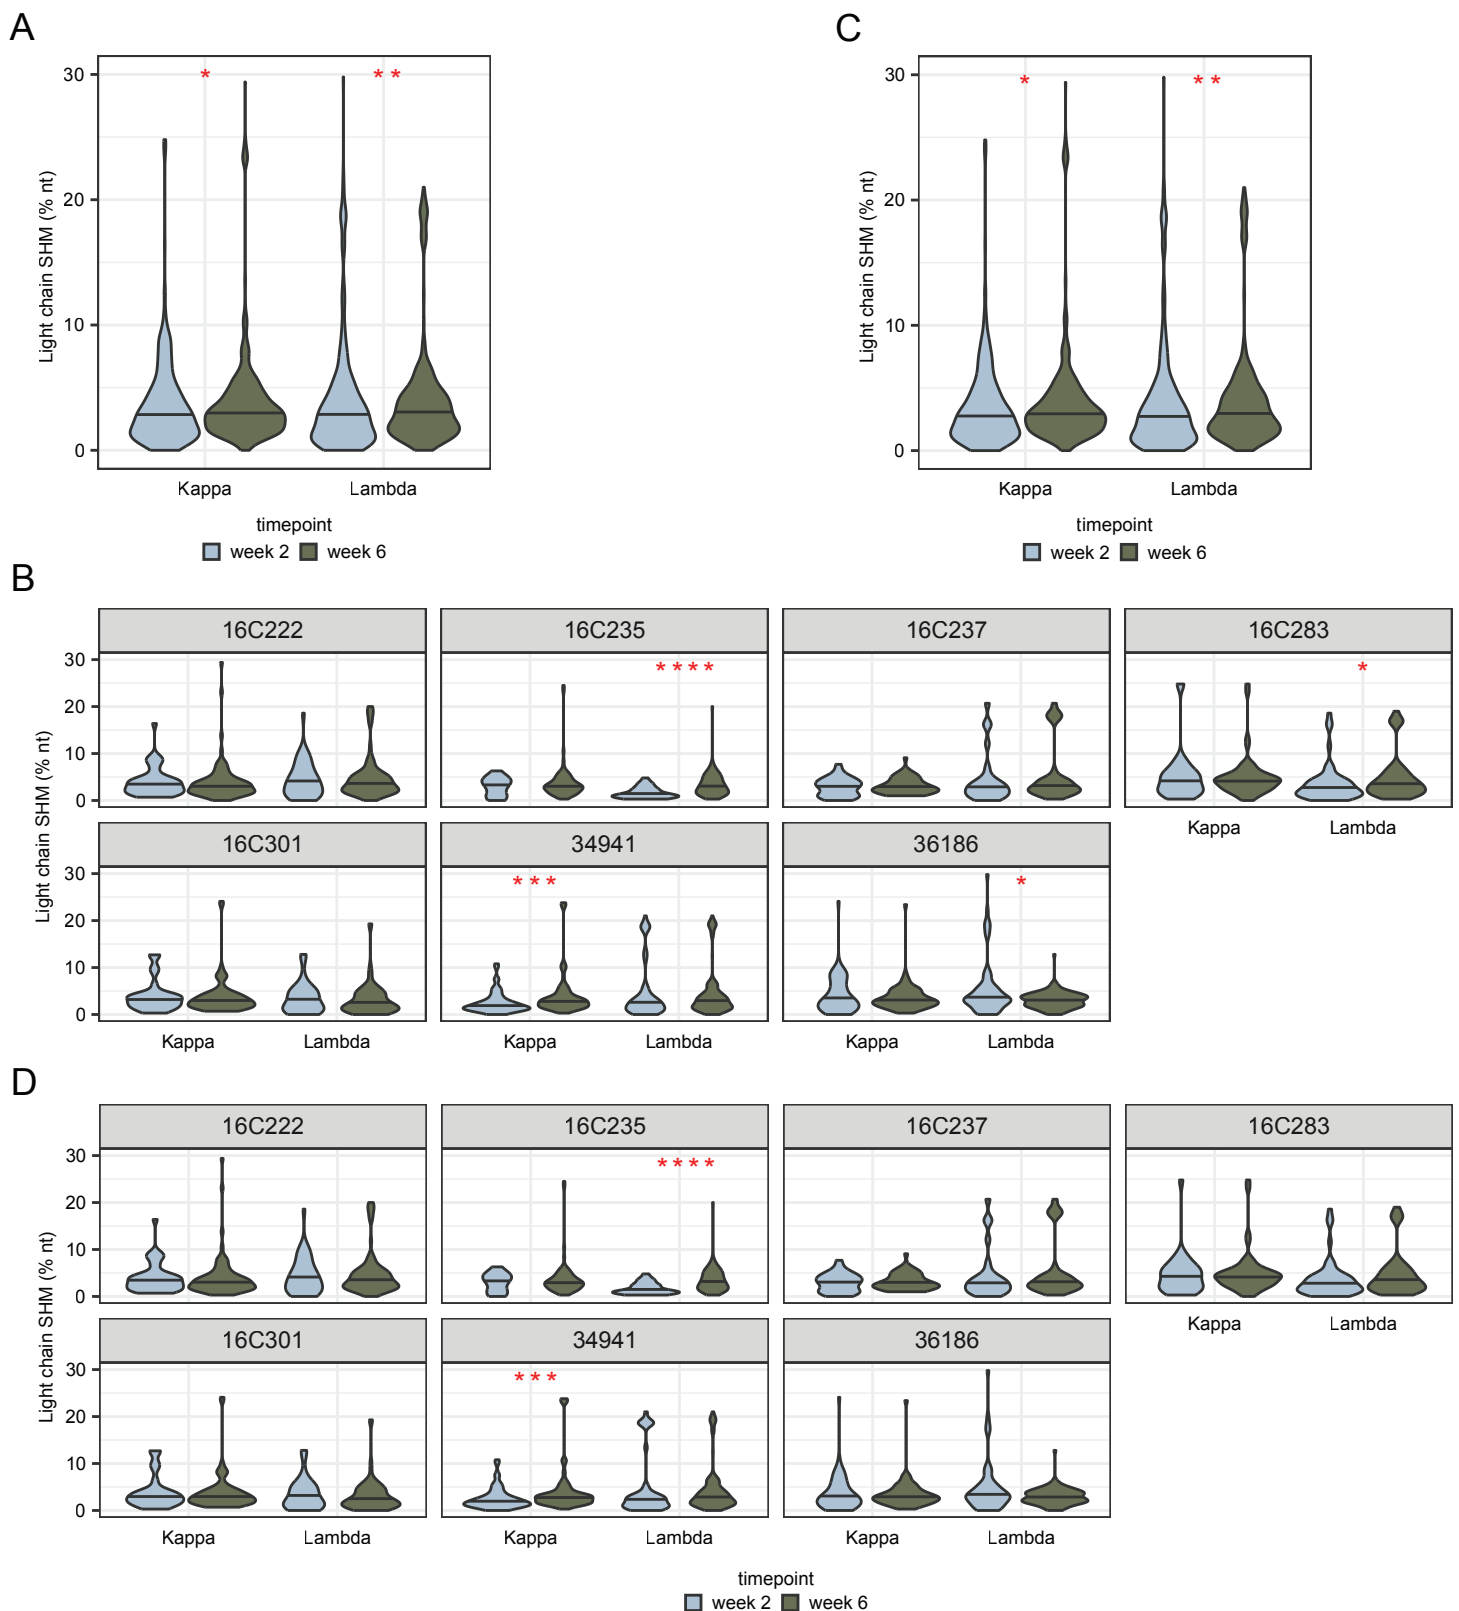

**Fig. S5. Mutational burden of IG light chains.** (A) Kappa and lambda light chain somatic hypermutation (SHM) of antigen-specific memory B cells. N=330 and 366 IgK and IgL sequences, respectively, at week 2 and 588 and 805 IgK and IgL sequences, respectively, at week 6. Distributions were compared using a 2-sided unpaired Wilcoxon test,  $P = 0.0402$  and  $0.0087$  for kappa and lambda, respectively. (B) The same data as in (A), divided by animal. 92 cells from animal 16C303 at week 2 are not included, as no matching week 6 data were available from that animal.  $P = 0.028$ ,  $2.5E-4$ , and  $0.044$  for 16C283-lambda, 34941-kappa, and 36186-lambda, respectively. (C) Kappa and lambda chain SHM down-sampled to one cell per lineage to account for possible confounding effects due to correlations in SHM among cells in the same lineage. N=311 IgK and 330 IgL lineages at week 2 and 531 IgK and 707 IgL lineages at week 6. Distributions were compared using a 2-sided unpaired Wilcoxon test,  $P = 0.016$  and  $0.003$  for kappa and lambda, respectively. (D) The same data as in (C), divided by animal, except that 43 IgK and 44 IgL lineages from animal 16C303 at week 2 are not included. N=268 IgK and 286 IgL lineages at week 2 and 531 IgK and 707 IgL lineages at week 6. Distributions were compared using a 2-sided unpaired Wilcoxon test.  $P = 6.4E-6$ ,  $0.028$ ,  $2.5E-4$ , and  $0.044$  for 16C235-lambda, 16C283-lambda, 34941-kappa, and 36186-lambda, respectively.

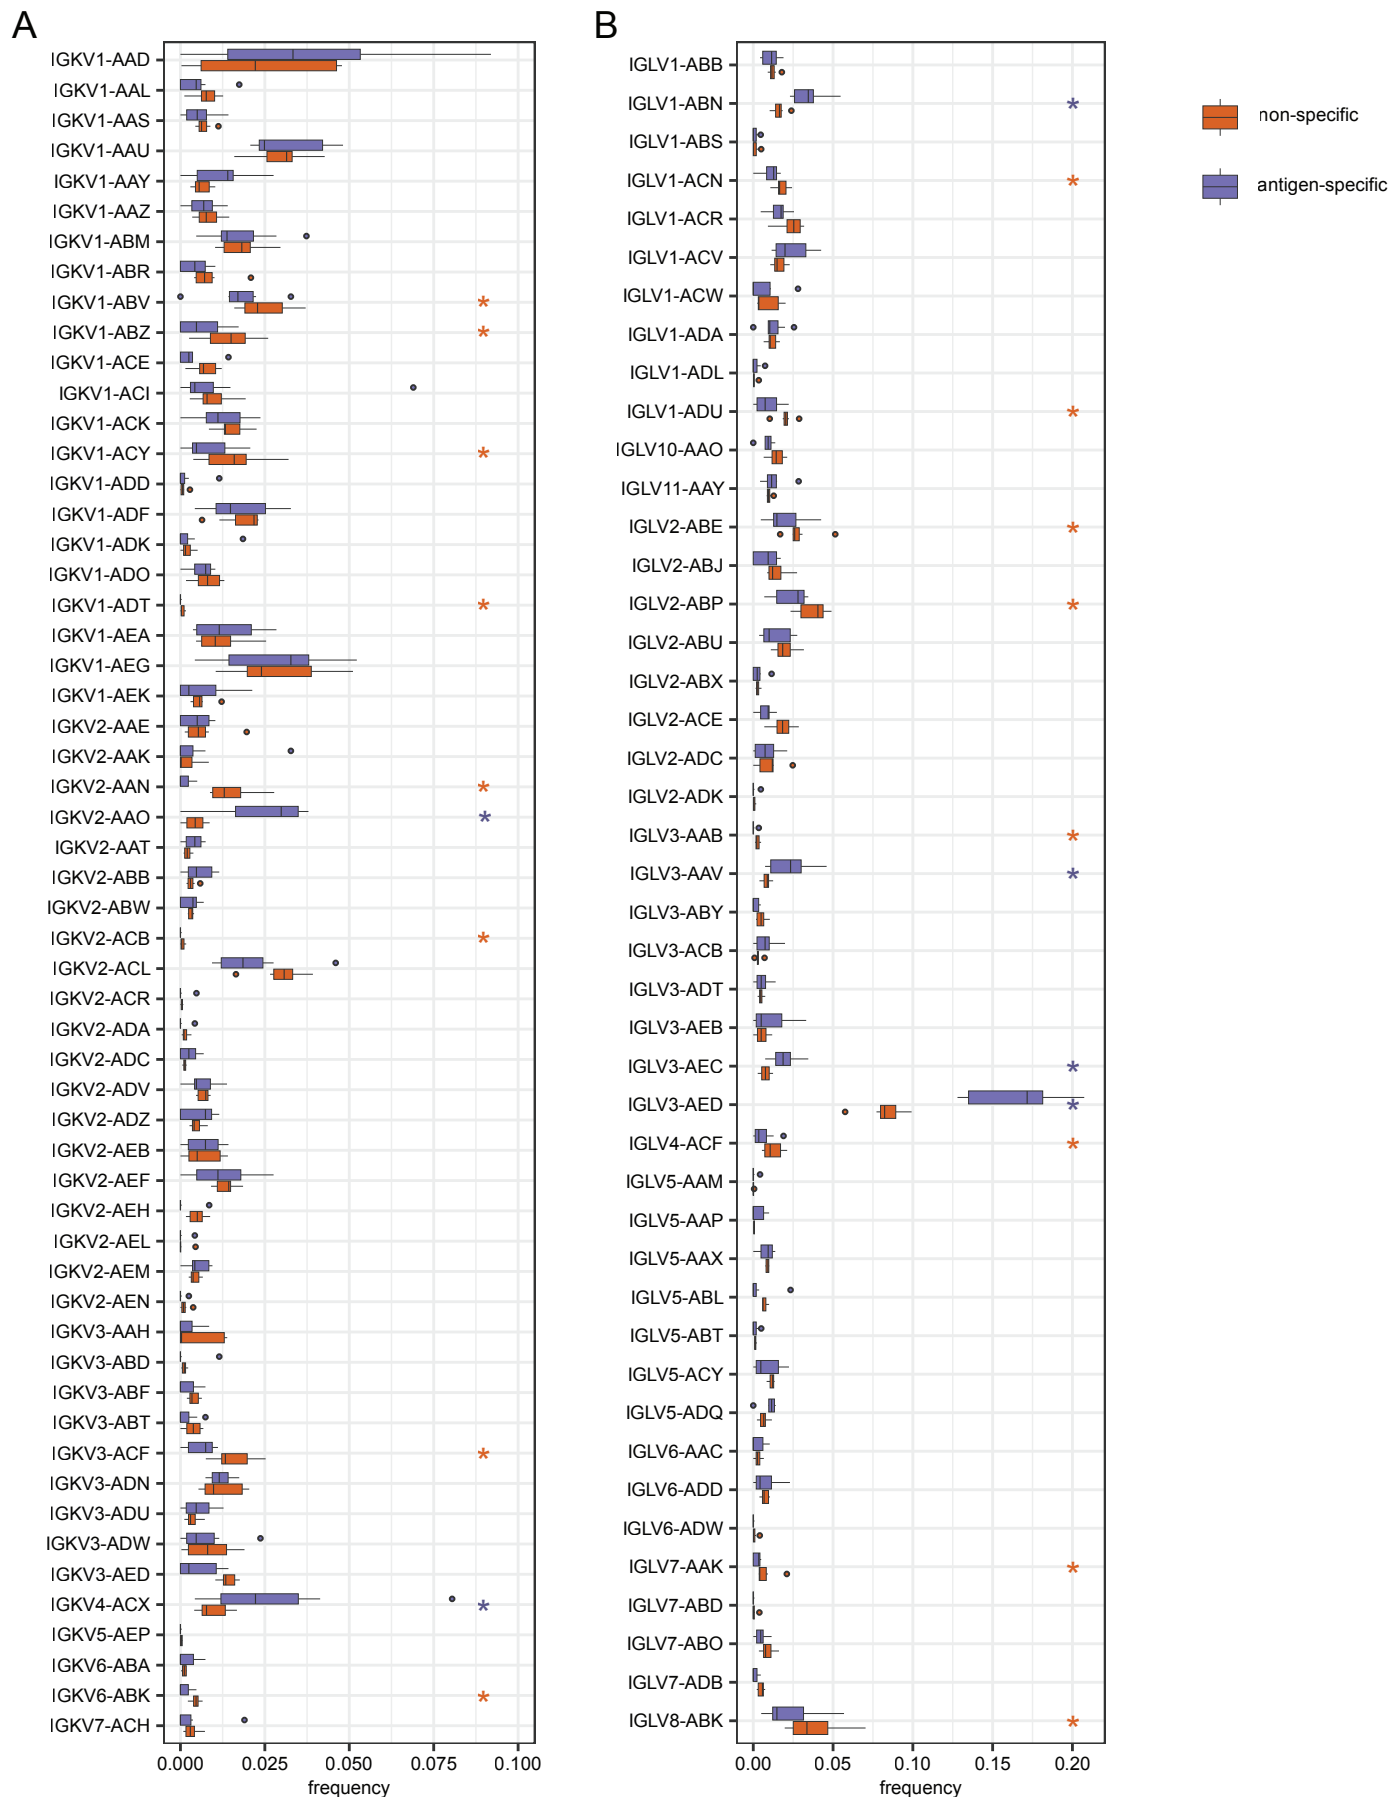

**Fig S6. IG light chain V gene usage.** Comparison of light chain VK (**A**) and VL (**B**) gene usage between all naïve B cells (orange) and antigen-specific memory B cells (purple) from 7 animals (animal 16C237 was excluded due to lack of naïve repertoire data). N=762 IgK and 946 IgL rearrangements from antigen-specific lineages and N=13,856 IgK and 15,330 IgL rearrangements from sorted naïve B cells. Boxes show the interquartile range, with the median marked as heavy horizontal band. Whisker represent the highest (lowest) datapoint within 1.5 times the interquartile range of the 75th (25th) percentile. Genes with statistically significant difference by a 2-sided paired Wilcoxon test are indicated with asterisks in the color of the up-regulated group.  $P = 0.016$  for *IGKV2-ANN*, *IGKV3-ACF*, *IGKV6-ABK*, *IGLV1-ABN*, *IGLV1-CAN*, *IGLV2-ABP*, *IGLV3-AAB*, *IGLV3-AED*, *IGLV4-ACF*, and *IGLV7-AAK*.  $P = 0.031$  for *IGKV4-ACX*, *IGLV2-ABE*, *IGLV3-AEC*, and *IGLV8-ABK*.  $P = 0.036$  for *IGKV1-ADT*, *IGKV2-AAO*, and *IGKV2-ACB*.  $P = 0.047$  for *IGKV1-ABV*, *IGKV1-ABZ*, *IGKV1-ACY*, *IGLV1-ADU*, and *IGLV3-AAV*.

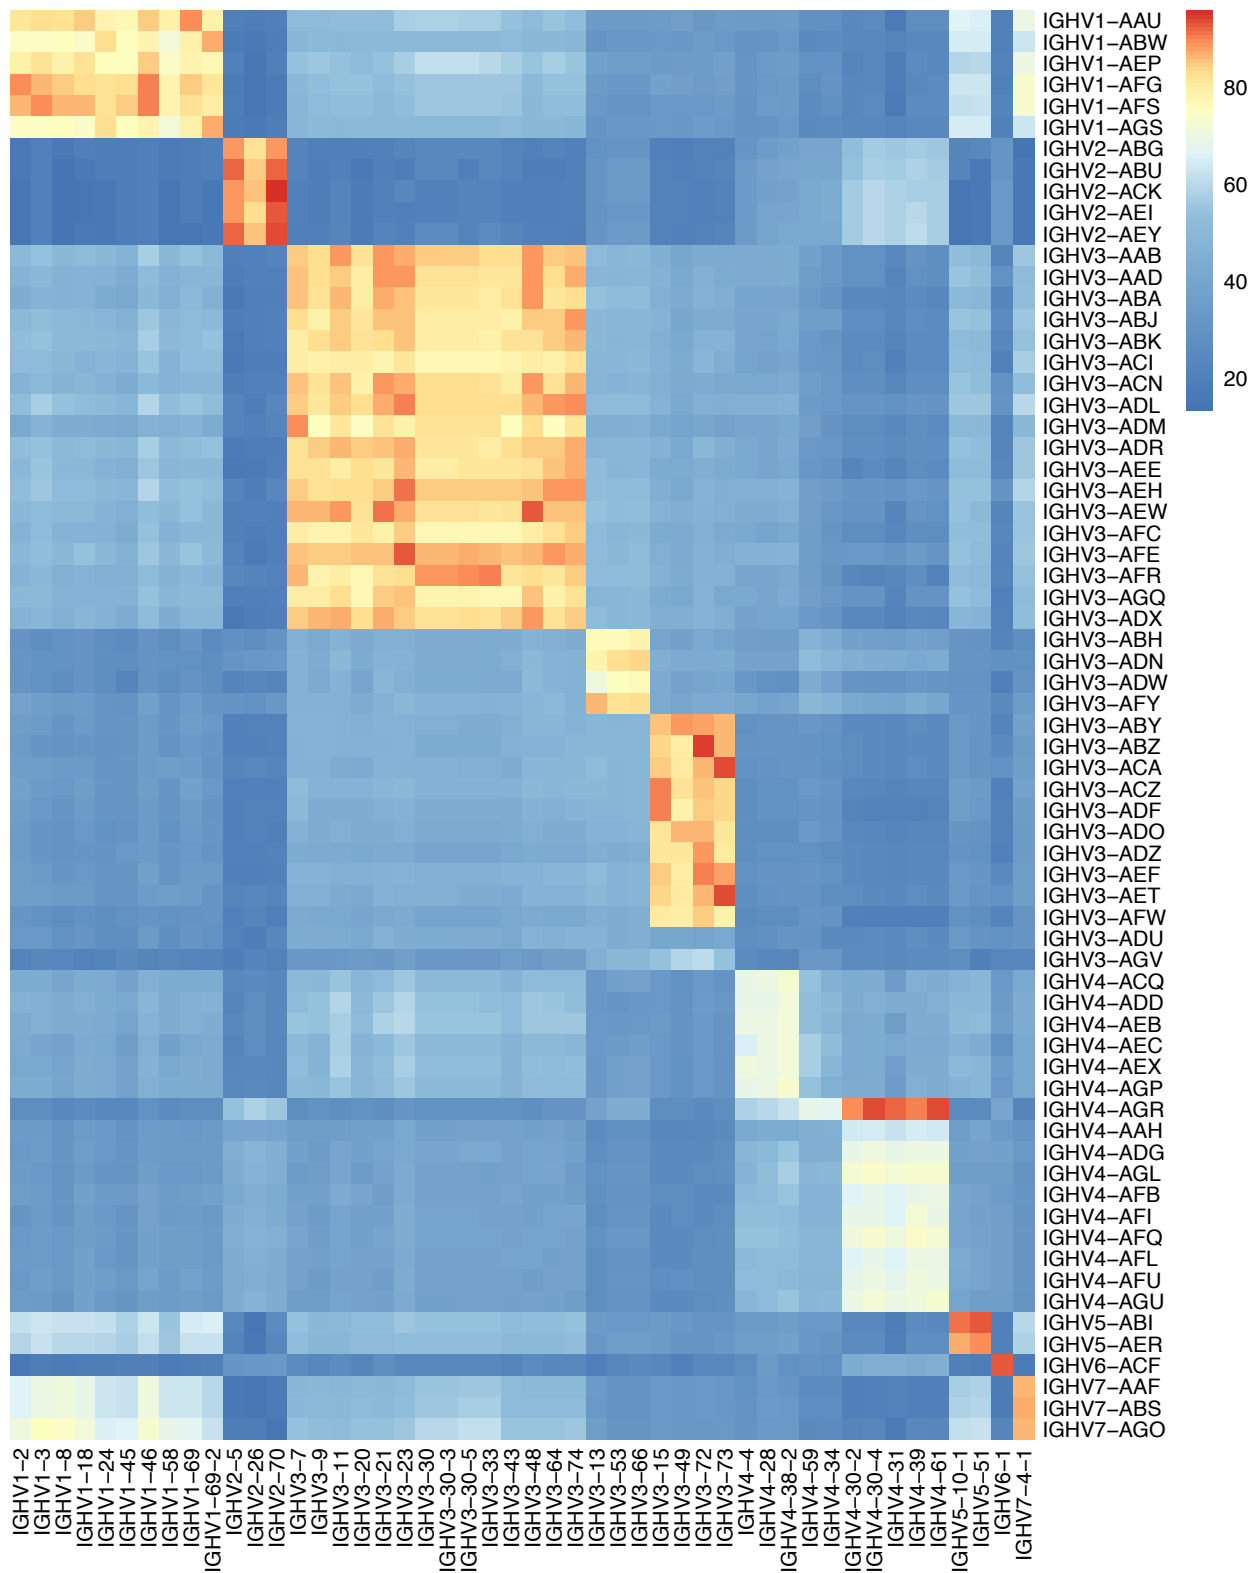

**Fig. S7. Amino acid sequence homology between human and rhesus IGHV genes.** Human IGHV genes are shown on the x-axis, rhesus genes are shown on the y-axis.

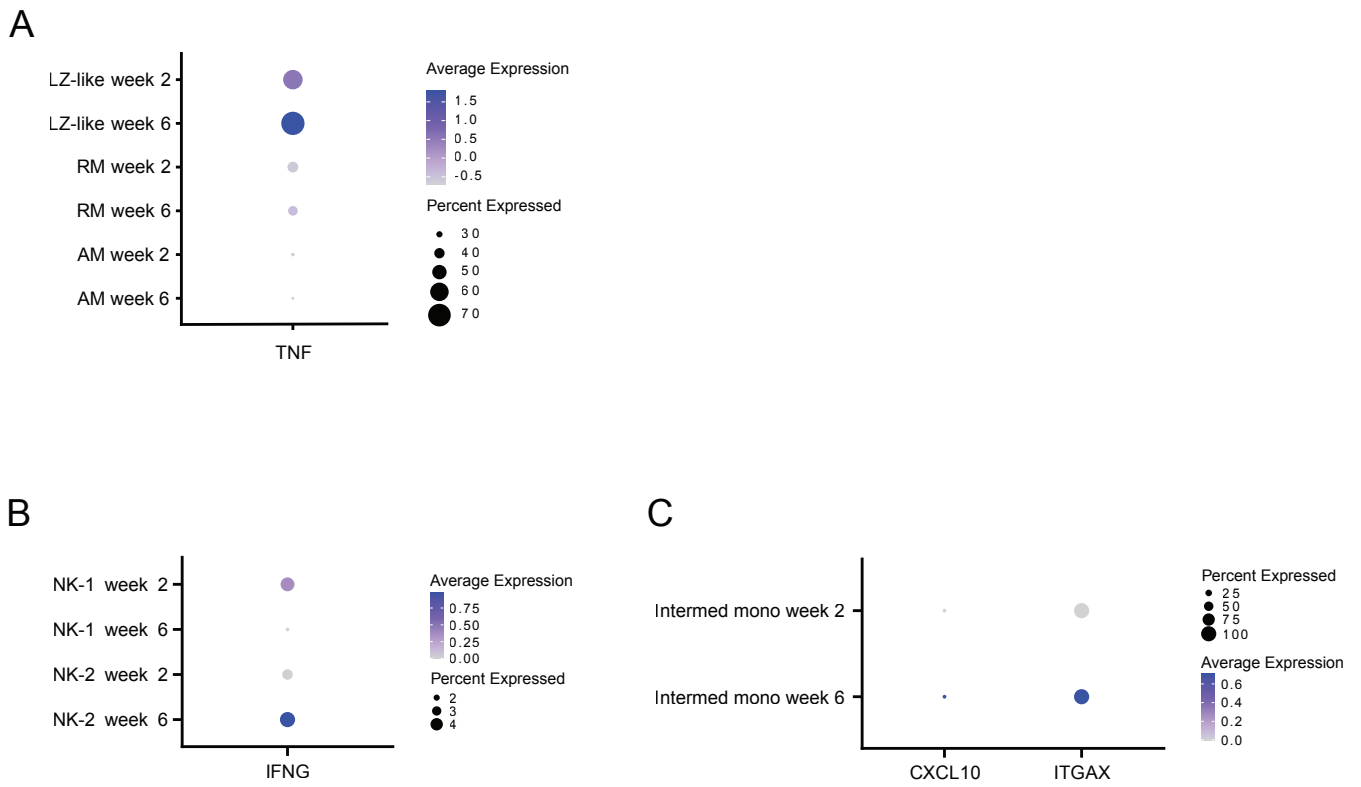

**Fig. S8. Specific markers upregulated at week 6 compared to week 2. (A)** LZ-like B cells upregulate *TNF* at week 6 compared to week 2. **(B)** *IFNG* is upregulated at week 6 compared to week 2 in NK-2 cells. **(C)** *ITGAX* (CD11c) is upregulated at week 6 compared to week 2 in intermediate monocytes. *CXCL10* (IP-10) expression was not detected at either time point.



**Table S1. Genes included in vaccine response signature.**

|        |           |
|--------|-----------|
| ATF3   | IL1R1     |
| BCL2A1 | IL1R2     |
| CCL2   | IL6       |
| CCL20  | ITGB3     |
| CD38   | JAG1      |
| CD69   | KCNJ2     |
| CD9    | LAMP3     |
| CLEC5A | MAFF      |
| CXCL10 | MARCO     |
| CXCL2  | NR4A2     |
| CXCL8  | NR4A3     |
| CXCR6  | OLR1      |
| DUSP4  | P2RY2     |
| EDN1   | PDGFC     |
| EGR1   | PHLDA1    |
| EGR2   | PTGS2     |
| EGR3   | REL       |
| EREG   | RGS1      |
| F2RL1  | SERPINB2  |
| FFAR2  | SLC4A4    |
| FOSB   | SOCS3     |
| G0S2   | TNFAIP6   |
| ICAM1  | TNFRSF12A |
| IL1A   | TNFRSF21  |
| IL1B   | VEGFA     |

**Table S2. Antibody dilutions for innate and B cell sorting.**

| <b>Antibody</b> | <b>Fluorochrome</b> | <b>Catalog No.</b> | <b>Company</b>    | <b>Clone</b> | <b>Dilution</b> |
|-----------------|---------------------|--------------------|-------------------|--------------|-----------------|
| IgD             | FITC                | 2030-02            | Southern Biotech  | Polyclonal   | 1:50            |
| CD8             | BV510               | 301048             | Biologend         | RPA-T8       | 1:200           |
| CD56            | BV510               | 318340             | Biologend         | HCD56        | 1:200           |
| CD14            | BV510               | 301842             | Biologend         | M5E2         | 1:100           |
| CD27            | BV605               | 302830             | Biologend         | O323         | 1:40            |
| CD123           | BV786               | 564196             | BD Biosciences    | 7G3          | 1:250           |
| IgM             | CF594PE             | 562539             | BD Biosciences    | G20-127      | 1:100           |
| HLADR           | Cy5.5PE             | MHLDR18            | Life Technologies | TU36         | 1:200           |
| CD19            | PC7                 | IM36284            | Beckman Coulter   | 1A4CD27      | 1:20            |
| CD11c           | BUV395              | 744440             | BD Biosciences    | S-HCL-3      | 1:170           |
| Live/Dead       | UV blue             | L34962             | Invitrogen        | NA           | 1:200           |
| CD16            | BUV496              | 612944             | BD Biosciences    | 3G8          | 1:40            |
| CD20            | BUV805              | 564917             | BD Biosciences    | 2H7          | 1:40            |
| IgG             | Alx700              | 561296             | BD Biosciences    | G18-145      | 1:40            |
| CD3             | APCCy7              | 557757             | BD Biosciences    | SP34-2       | 1:50            |

Probes

|      |       |
|------|-------|
| RBD  | BV421 |
| S1   | BV570 |
| S-2P | APC   |
| NTD  | BV711 |

**Table S3. Antibody dilutions for T cell staining.**

| <b>Antibody</b> | <b>Fluorochrome</b> | <b>Catalog No.</b> | <b>Company</b>  | <b>Clone</b> | <b>Dilution</b> |
|-----------------|---------------------|--------------------|-----------------|--------------|-----------------|
| CD154           | BV421               | 310824             | Biolegend       | 24-31        | 1:80            |
| CD69            | FITC                | 310904             | Biolegend       | FN50         | 1:10            |
| CD4             | PE-Cy7              | 560644             | BD Biosciences  | L200         | 1:100           |
| CD3             | APC                 | 557597             | BD Biosciences  | SP34-2       | 1:10            |
| CD20            | BV510               | 563067             | BD Biosciences  | 2H7          | 1:20            |
| CD95            | BV650               | 305642             | Biolegend       | DX2          | 1:50            |
| CD8a            | BV785               |                    | Biolegend       | RPA-T8       | 1:40            |
| CD28            | ECD                 | 6607111            | Beckman Coulter | CD28.2       | 1:50            |
| CD14            | BV510               | 301842             | Biolegend       | M5E2         | 1:20            |

Table S4. **Ig enrichment primers.**

| <b>Primer</b> | <b>Sequence</b>                   |
|---------------|-----------------------------------|
| IgA_REV       | GAGGCTCAGCGGGAAGACCTTGGGGCTGGTCGG |
| IgG_REV       | GCCAGGGGGAAGACCGATGGGCCCTTGGTGGA  |
| IgK_REV       | GGGTAGAAGTTATTCAGCAGGCACAC        |
| IgL_REV       | GGGTAGAAGTCACTTATGAGACACAC        |
